# Supplementary material for: Peer victimisation during adolescence and its impact on wellbeing in adulthood: a prospective cohort study
Source: PubMed Central journal article supplement (PMC7811215; doi:10.1186/s12889-021-10198-w), 2021-01-15
Supplement: 12889_2021_10198_MOESM2_ESM.pdf [file 12889_2021_10198_MOESM2_ESM.pdf]

**Peer victimisation during adolescence and its impact on wellbeing in adulthood: A prospective cohort study.**

*BMC Public Health*

Jessica M. Armitage<sup>a</sup>, R. Adele H. Wang, Oliver S. P. Davis, Lucy Bowes, Claire M. A. Haworth.

<sup>a</sup>School of Psychological Science, University of Bristol, Bristol, BS8 1TU, United Kingdom.  
jessica.armitage@bristol.ac.uk

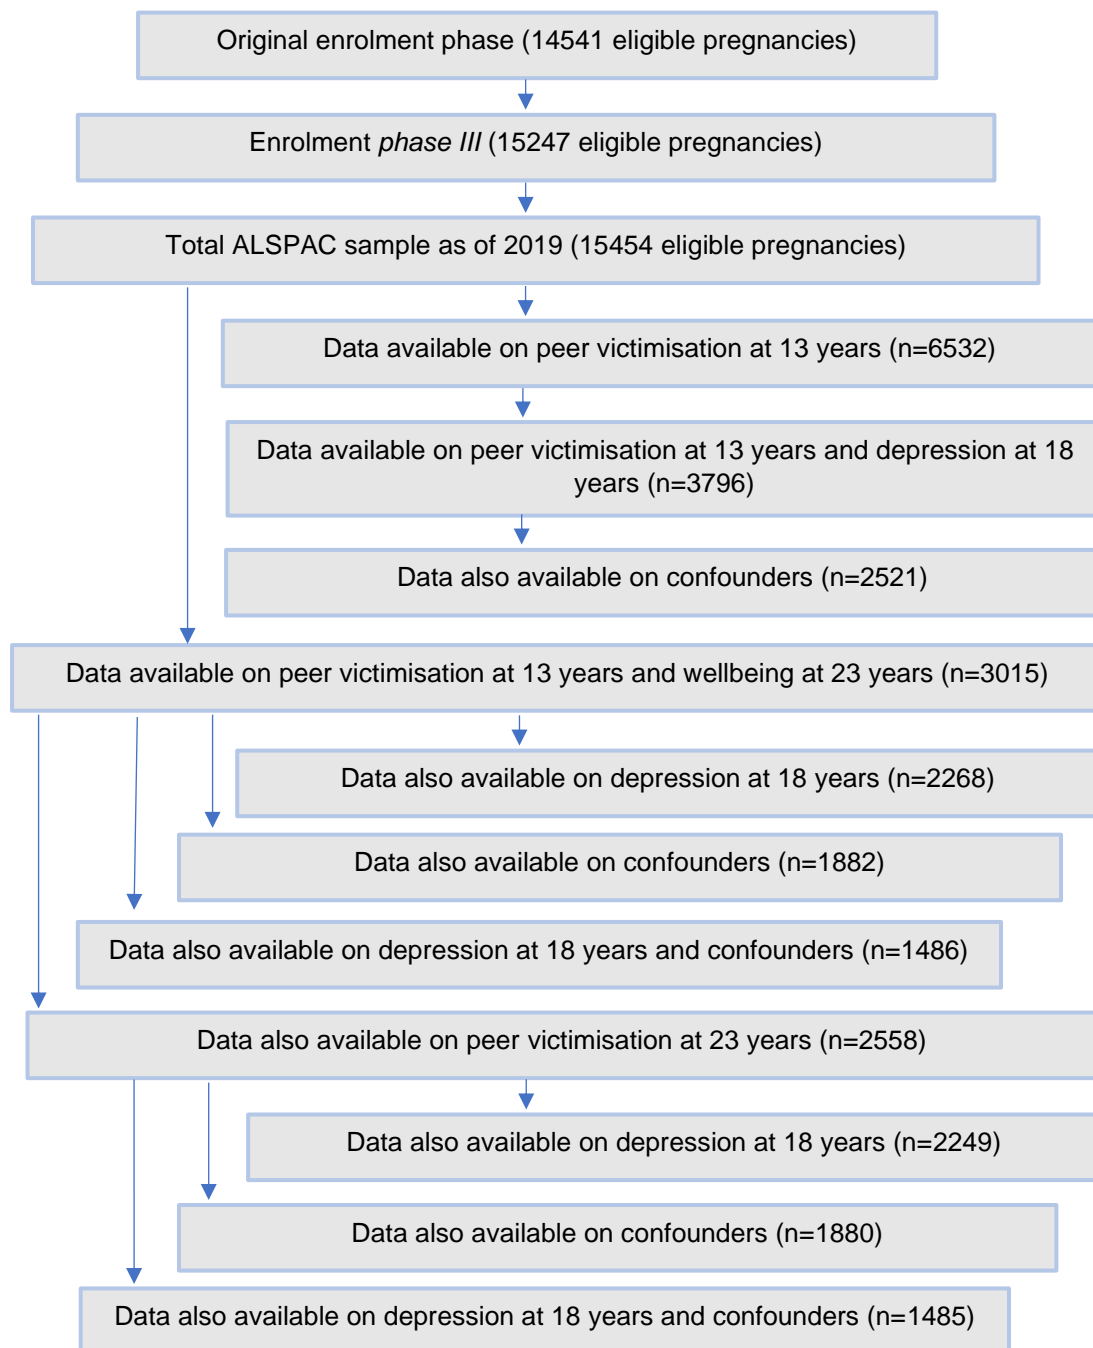

**Supplementary Figure 1:** Flowchart of participants in the Avon Longitudinal Study of Parents and Children
