# Supplementary material for: Peer victimisation during adolescence and its impact on wellbeing in adulthood: a prospective cohort study
Source: PubMed Central journal article supplement (PMC7811215; doi:10.1186/s12889-021-10198-w), 2021-01-15
Supplement: 12889_2021_10198_MOESM3_ESM.pdf [file 12889_2021_10198_MOESM3_ESM.pdf]

**Peer victimisation during adolescence and its impact on wellbeing in adulthood: A prospective cohort study.**

*BMC Public Health*

Jessica M. Armitage<sup>a</sup>, R. Adele H. Wang, Oliver S. P. Davis, Lucy Bowes, Claire M. A. Haworth.

<sup>a</sup>School of Psychological Science, University of Bristol, Bristol, BS8 1TU, United Kingdom.  
jessica.armitage@bristol.ac.uk

**Supplementary Table 2:** Frequency of victimisation experiences aged 13. Values are numbers (percentages)

| Items                                                                 | Frequency of victimisation |                        |                      |                             |
|-----------------------------------------------------------------------|----------------------------|------------------------|----------------------|-----------------------------|
|                                                                       | Never                      | Occasional (1-3 times) | Frequent (> 4 times) | Very Frequent (>1 per week) |
| Someone took teenager's belongings                                    | 5173 (77.6)                | 1101 (16.5)            | 227 (3.4)            | 166 (2.5)                   |
| Someone threatened or blackmailed teenager                            | 6043 (90.6)                | 472 (7.1)              | 99 (1.5)             | 53 (0.8)                    |
| Someone hit or beat up teenager                                       | 5906 (88.6)                | 575 (8.6)              | 118 (1.8)            | 67 (1.0)                    |
| Someone tricked teenager                                              | 6155 (92.2)                | 438 (6.6)              | 45 (0.7)             | 35 (0.5)                    |
| Someone called teenager nasty names                                   | 4264 (64.1)                | 1230 (18.5)            | 589 (8.8)            | 574 (8.6)                   |
| Peers would not hang around just to upset teenager                    | 5976 (89.8)                | 485 (7.3)              | 124 (1.9)            | 68 (1.0)                    |
| Peers tried to get teenager to do things he or she did not want to do | 6112 (92.0)                | 416 (6.3)              | 77 (1.2)             | 41 (0.5)                    |
| Peers told lies about teenager                                        | 5533 (83.7)                | 757 (11.4)             | 217 (3.3)            | 104 (1.6)                   |
| Peers spoilt games to upset teenager                                  | 6332 (95.3)                | 228 (3.4)              | 49 (0.7)             | 40 (0.6)                    |

Note:

Items derived from the modified version of the bullying and friendship interview schedule.
