# Supplementary material for: Peer victimisation during adolescence and its impact on wellbeing in adulthood: a prospective cohort study
Source: PubMed Central journal article supplement (PMC7811215; doi:10.1186/s12889-021-10198-w), 2021-01-15
Supplement: 12889_2021_10198_MOESM5_ESM.pdf [file 12889_2021_10198_MOESM5_ESM.pdf]

**Peer victimisation during adolescence and its impact on wellbeing in adulthood: A prospective cohort study.**

*BMC Public Health*

Jessica M. Armitage<sup>a</sup>, R. Adele H. Wang, Oliver S. P. Davis, Lucy Bowes, Claire M. A. Haworth.

<sup>a</sup>School of Psychological Science, University of Bristol, Bristol, BS8 1TU, United Kingdom. jessica.armitage@bristol.ac.uk

**Supplementary Table 4:** Description of confounding factors and variables used for imputation

| <b>Construct</b>                                        | <b>Study child age</b> | <b>Question answered by</b> | <b>Measure name</b>                                     | <b>Number of items</b> | <b>Sample item</b>                                     | <b>Item scoring</b>                                       | <b>Higher score represents</b>         | <b>Cronbach's alpha</b> |
|---------------------------------------------------------|------------------------|-----------------------------|---------------------------------------------------------|------------------------|--------------------------------------------------------|-----------------------------------------------------------|----------------------------------------|-------------------------|
| <b>Confounders</b>                                      |                        |                             |                                                         |                        |                                                        |                                                           |                                        |                         |
| Bullying Perpetration                                   | 13 years               | Participant                 | Bullying and Friendship Interview Schedule <sup>a</sup> | 9                      | "Frequency someone took teenagers personal belongings" | 3-point scale ranging from "Seldom" to "Very frequently"  | Greater bullying perpetration          | 0.64                    |
| Depressive Symptoms                                     | 13 years               | Participant                 | Moods and Feelings Questionnaire <sup>b</sup>           | 13                     | "Teenager felt miserable or unhappy"                   | 3-point scale ranging from "Not at all" to "True"         | Greater depressive symptoms            | 0.84                    |
| Emotional problems                                      | 7 years                | Mother                      | Strengths and Difficulties Questionnaire <sup>c</sup>   | 5                      | "Child often tearful/unhappy in past 6 months"         | 3-point scale ranging from "Not true" to "Certainly true" | Greater emotional and conduct problems | 0.73                    |
| Conduct problems                                        | 7 years                | Mother                      | Strengths and Difficulties Questionnaire <sup>c</sup>   | 5                      | "Child often lied or cheated in past 6 months"         |                                                           |                                        |                         |
| Child Maltreatment: Physical, sexual or taken into care | 7 years                | Mother                      | Child Abuse/Maltreatment                                | 3                      | "Child was taken into care since his/her 5th birthday" | 1=Yes, 0=No                                               | Child has experienced maltreatment     | -                       |

|                                             |                    |             |                                                                                              |    |                                                                      |                                                                        |                                                                                                                                                                |      |
|---------------------------------------------|--------------------|-------------|----------------------------------------------------------------------------------------------|----|----------------------------------------------------------------------|------------------------------------------------------------------------|----------------------------------------------------------------------------------------------------------------------------------------------------------------|------|
| Maternal education                          | 32 weeks gestation | Mother      | Highest education qualification                                                              | 1  | "What educational qualifications do you have?"                       | 6-point educational scale                                              | Higher educational qualification                                                                                                                               | -    |
| Maternal depression                         | 21-134 months      | Mother      | Edinburgh Postnatal Maternal Depressional Scale <sup>d</sup>                                 | 10 | "Mother has felt sad or miserable in the past week"                  | 4-point scale ranging from "Yes often" to "Never"                      | Greater depression                                                                                                                                             | 0.83 |
| Social class                                | 18 weeks gestation | Mother      | Social class based on occupation (mother)                                                    | 1  | -                                                                    | 6-point scale ranging from "Unskilled" to "Professional"               | Higher social class                                                                                                                                            | -    |
| Employment                                  | 23 years           | Participant | Current employment status                                                                    | 4  | "Are you currently in full-time paid work (over 30 hours a week)?"   | 0=No, 1=Yes                                                            | Classified as employed if participant is in full-time paid work, part-time paid work, irregular/occasional work, self-employed, or doing modern apprenticeship | -    |
| Income                                      | 23 years           | Participant | Total take-home pay each month (after tax and national insurance are removed as appropriate) | 1  | "What is your total take-home pay each month after tax?"             | 7-point scale ranging from "£0, not in paid work" to "£3000 and above" | Higher income                                                                                                                                                  | -    |
| <b><i>Variables used for imputation</i></b> |                    |             |                                                                                              |    |                                                                      |                                                                        |                                                                                                                                                                |      |
| Mother's age                                | 18 weeks gestation | Mother      | Mother's age at first pregnancy                                                              | 1  | "How old were you when you became pregnant for the very first time?" | Responses range from 13 to 46.                                         | Higher age                                                                                                                                                     | -    |
| Financial circumstances                     | 32 weeks gestation | Mother      | Financial difficulties                                                                       | 5  | "Difficulty affording heating"                                       | 4-point scale ranging from "Not difficult" to "Very difficult"         | Greater financial difficulties                                                                                                                                 | -    |

|                       |                    |             |                                                              |   |                                                                        |                                                                             |                               |   |
|-----------------------|--------------------|-------------|--------------------------------------------------------------|---|------------------------------------------------------------------------|-----------------------------------------------------------------------------|-------------------------------|---|
| Number of pregnancies | 33 months          | Mother      | Number of pregnancies since study child                      | 1 | "How many times have you been pregnant since having this study child?" | Responses range from 0 to 9.                                                | Greater number of pregnancies | - |
| Child IQ              | 8 years            | Participant | Wechsler Intelligence Scale for Children (WISC) <sup>e</sup> |   | -                                                                      | Responses range from 45 to 151.                                             | Higher IQ                     | - |
| Home ownership        | 8 weeks gestation  | Mother      | Home ownership status                                        | 1 | "Is your home being..."                                                | 6-point scale ranging from "Rented from housing association" to "Mortgaged" | Greater home ownership        | - |
| Smoking status        | 18 weeks gestation | Mother      | Daily tar intake pre-pregnancy                               | 4 | "Number smoked per day pre-pregnancy"                                  | Responses ranged from 0 to 450.                                             | Greater tar intake            | - |

<sup>a</sup> Wolke, D., Woods, S., Stanford, K., & Schulz, H. (2001). Bullying and victimization of primary school children in England and Germany: prevalence and school factors. *British Journal of Psychology*, *92*, 673-696.

<sup>b</sup> Angold, A., Costello, E. J., Messer, S. C., Pickles, A., Winder, F., & Silver, D. (1995). The development of a short questionnaire for use in epidemiological studies of depression in children and adolescents. *International Journal of Methods in Psychiatric Research*, *5*, 237-249.

<sup>c</sup> Goodman, M. R. (2001). Psychometric properties of the Strengths and Difficulties Questionnaire. *Journal of the American Academy of Child and Adolescent Psychiatry*, *40*, 1337-1345.

<sup>d</sup> Cox, J. L., Holden, J. M., & Sagovsky, R. (1987). Detection of postnatal depression: Development of the 10-item Edinburgh Postnatal Depression Scale. *British Journal of Psychiatry*, *150*, 782-786. DOI:10.1192/bjp.150.6.782

<sup>e</sup> Wechsler, D. (1949). Wechsler Intelligence Scale for Children. San Antonio, TX, US: Psychological Corporation.
