# Supplementary material for: Peer victimisation during adolescence and its impact on wellbeing in adulthood: a prospective cohort study
Source: PubMed Central journal article supplement (PMC7811215; doi:10.1186/s12889-021-10198-w), 2021-01-15
Supplement: 12889_2021_10198_MOESM6_ESM.pdf [file 12889_2021_10198_MOESM6_ESM.pdf]

**Peer victimisation during adolescence and its impact on wellbeing in adulthood: A prospective cohort study.**

*BMC Public Health*

Jessica M. Armitage<sup>a</sup>, R. Adele H. Wang, Oliver S. P. Davis, Lucy Bowes, Claire M. A. Haworth.

<sup>a</sup>School of Psychological Science, University of Bristol, Bristol, BS8 1TU, United Kingdom. jessica.armitage@bristol.ac.uk

**Supplementary Table 5:** Linear regression results for wellbeing aged 23 years based on experiences of peer victimisation using complete cases (N=1485)

|                                                               | Occasional victimisation <sup>†</sup> |      |         |           | Frequent victimisation <sup>††</sup> |      |         |           |
|---------------------------------------------------------------|---------------------------------------|------|---------|-----------|--------------------------------------|------|---------|-----------|
|                                                               | Estimate                              | SE   | P value | R Squared | Estimate                             | SE   | P value | R Squared |
| <b>Model 1</b>                                                |                                       |      |         |           |                                      |      |         |           |
| Unadjusted model                                              | -0.60                                 | 0.49 | 0.22    | 0.01      | -2.72                                | 0.64 | <0.001  | 0.01      |
| <b>Model 2<sup>a</sup></b>                                    |                                       |      |         |           |                                      |      |         |           |
| Adjusted for confounders only                                 | 0.46                                  | 0.50 | 0.35    | 0.08      | -0.60                                | 0.75 | 0.42    | 0.08      |
| <b>Model 3<sup>b</sup></b>                                    |                                       |      |         |           |                                      |      |         |           |
| Adjusted for depression only                                  | -0.60                                 | 0.48 | 0.21    | 0.03      | -2.48                                | 0.64 | <0.001  | 0.03      |
| <b>Model 4<sup>a,b</sup></b>                                  |                                       |      |         |           |                                      |      |         |           |
| Adjusted for depression and confounders                       | 0.40                                  | 0.50 | 0.42    | 0.08      | -0.53                                | 0.75 | 0.48    | 0.08      |
| <b>Model 5<sup>c</sup></b>                                    |                                       |      |         |           |                                      |      |         |           |
| Adjusted for adult victimisation only                         | -0.42                                 | 0.48 | 0.39    | 0.03      | -2.52                                | 0.63 | <0.001  | 0.03      |
| <b>Model 6<sup>a,c</sup></b>                                  |                                       |      |         |           |                                      |      |         |           |
| Adjusted for adult victimisation and confounders              | 0.61                                  | 0.50 | 0.22    | 0.10      | -0.41                                | 0.75 | 0.58    | 0.10      |
| <b>Model 7<sup>b,c</sup></b>                                  |                                       |      |         |           |                                      |      |         |           |
| Adjusted for adult victimisation and depression               | -0.43                                 | 0.48 | 0.37    | 0.05      | -2.30                                | 0.63 | <0.001  | 0.05      |
| <b>Model 8<sup>a,b,c</sup></b>                                |                                       |      |         |           |                                      |      |         |           |
| Adjusted for adult victimisation, depression, and confounders | 0.55                                  | 0.49 | 0.26    | 0.10      | -0.35                                | 0.74 | 0.64    | 0.10      |

Note:

<sup>a</sup> Adjustments: children's individual characteristics (sex, emotional and behavioural problems aged 7, depressive symptoms and bullying perpetration aged 13, employment status and income aged 23) and family characteristics (social class reported by mothers, mother's education, maternal depression and child exposure to physical or sexual abuse aged 7).

<sup>b</sup> Adjustments: depression diagnoses from the CIS-R at 18 years.

<sup>c</sup> Adjustments: peer victimisation at 23 years.

<sup>†</sup> Estimates relate to the impact of occasional victimisation on wellbeing aged 23

<sup>††</sup> Estimates relate to the impact of frequent victimisation on wellbeing aged 23
