# Supplementary material for: Peer victimisation during adolescence and its impact on wellbeing in adulthood: a prospective cohort study
Source: Springer Nature journal article supplement (doi:10.1186/s12889-021-10198-w), 2021-01-15
Supplement: MOESM1 [file 18771850]

**Peer victimisation during adolescence and its impact on wellbeing in adulthood: A prospective cohort study.**

*BMC Public Health*

Jessica M. Armitage<sup>a</sup>, R. Adele H. Wang, Oliver S. P. Davis, Lucy Bowes, Claire M. A. Haworth.

<sup>a</sup>School of Psychological Science, University of Bristol, Bristol, BS8 1TU, United Kingdom. [jessica.armitage@bristol.ac.uk](mailto:jessica.armitage@bristol.ac.uk)

**Supplementary Table 1:** Response patterns across variables

|                                          | Full sample in ALSPAC (N) | % also with victimisation data <sup>a</sup> | % also with depression data <sup>b</sup> | % also with wellbeing data <sup>c</sup> | % with victimisation, depression, and wellbeing <sup>d</sup> |
|------------------------------------------|---------------------------|---------------------------------------------|------------------------------------------|-----------------------------------------|--------------------------------------------------------------|
| <b>Predictor variable</b>                |                           |                                             |                                          |                                         |                                                              |
| Peer victimisation                       | 6529                      | 6529 (100%)                                 | 3796 (58.1%)                             | 3015 (46.2%)                            | 2268 (34.8%)                                                 |
| <b>Outcome variables</b>                 |                           |                                             |                                          |                                         |                                                              |
| Depression                               | 4513                      | 3796 (84.1%)                                | 4513 (100%)                              | 2558 (56.7%)                            | 2268 (50.3%)                                                 |
| Wellbeing (WEMWBS)                       | 4041                      | 3015 (74.6%)                                | 2558 (63.3%)                             | 4041 (100%)                             | 2268 (56.1%)                                                 |
| <b>Confounding variables</b>             |                           |                                             |                                          |                                         |                                                              |
| <i><b>Individual Characteristics</b></i> |                           |                                             |                                          |                                         |                                                              |
| Childhood emotional problems             | 8112                      | 5201 (64.1%)                                | 3548 (43.7%)                             | 3101 (38.2%)                            | 1941 (23.9%)                                                 |
| Childhood conduct problems               | 8089                      | 5179 (64.0%)                                | 3541 (43.8%)                             | 3103 (38.3%)                            | 1941 (24.0%)                                                 |
| Childhood maltreatment: Physical         | 8352                      | 5319 (63.7%)                                | 3631 (43.5%)                             | 3173 (40.0%)                            | 1982 (23.7%)                                                 |
| Childhood maltreatment: Sexual           | 8361                      | 5325 (64.0%)                                | 3634 (43.4%)                             | 3175 (38.0%)                            | 1982 (23.7%)                                                 |
| Childhood maltreatment: Taken into care  | 8361                      | 5324 (63.7%)                                | 3633 (43.4%)                             | 3175 (38.0%)                            | 1982 (23.7%)                                                 |
| Adolescent depressive symptoms           | 6627                      | 6467 (97.6%)                                | 3857 (58.2%)                             | 3043 (45.9%)                            | 2250 (34.8%)                                                 |
| Adolescent bullying perpetration         | 6574                      | 6470 (98.4%)                                | 3824 (58.1%)                             | 3030 (46.1%)                            | 2251 (34.8%)                                                 |
| Income aged 23                           | 3883                      | 2902 (74.7%)                                | 2484 (64.0%)                             | 3811 (98.1%)                            | 2169 (55.6%)                                                 |
| Occupation aged 23                       | 3984                      | 2978 (74.7%)                                | 2535 (63.6%)                             | 3907 (98.1%)                            | 2212 (55.5%)                                                 |
| <i><b>Family Characteristics</b></i>     |                           |                                             |                                          |                                         |                                                              |
| Maternal social class                    | 9509                      | 4969 (49.4%)                                | 3462 (36.4%)                             | 3043 (32.0%)                            | 1819 (19.1%)                                                 |

|                                      |        |              |              |              |              |
|--------------------------------------|--------|--------------|--------------|--------------|--------------|
| Maternal education: O levels or less | 12,311 | 5980 (48.6%) | 4104 (33.3%) | 3620 (29.4%) | 2115 (17.8%) |
| Maternal depression                  | 10,269 | 5610 (54.6%) | 3850 (37.5%) | 3400 (33.1%) | 2031 (19.8%) |

<sup>a</sup> Individuals with complete data on the measured variable, who were also assessed for victimisation aged 13.

<sup>b</sup> Individuals with complete data on the measured variable, who were also assessed for depression at the 18 year clinic.

<sup>c</sup> Individuals with complete data on the measured variable, who were also assessed for wellbeing at 23 years

<sup>d</sup> Individuals with complete data on the measured variable, who were also assessed for victimisation aged 13, depression aged 18, and wellbeing at 23 years.
