# Supplementary material for: Peer victimisation during adolescence and its impact on wellbeing in adulthood: a prospective cohort study
Source: Springer Nature journal article supplement (doi:10.1186/s12889-021-10198-w), 2021-01-15
Supplement: MOESM4 [file 18771850]

**Peer victimisation during adolescence and its impact on wellbeing in adulthood: A prospective cohort study.**

*BMC Public Health*

Jessica M. Armitage<sup>a</sup>, R. Adele H. Wang, Oliver S. P. Davis, Lucy Bowes, Claire M. A. Haworth.

<sup>a</sup>School of Psychological Science, University of Bristol, Bristol, BS8 1TU, United Kingdom. jessica.armitage@bristol.ac.uk

**Supplementary Table 3:** Pearson correlation estimates among main outcome measures and wellbeing scales

|                                                     | Victimisation | Depression <sup>a</sup> | WEMWBS       | Subjective Happiness Scale | Satisfaction with Life Scale | Meaning in Life Scale | Basic Psychological Needs Scale: Autonomy | Basic Psychological Needs Scale: Relatedness | Basic Psychological Needs Scale: Competence |
|-----------------------------------------------------|---------------|-------------------------|--------------|----------------------------|------------------------------|-----------------------|-------------------------------------------|----------------------------------------------|---------------------------------------------|
| <b>Victimisation</b>                                | 1             |                         |              |                            |                              |                       |                                           |                                              |                                             |
| <b>Depression<sup>a</sup></b>                       | ***<br>0.076  | 1                       |              |                            |                              |                       |                                           |                                              |                                             |
| <b>WEMWBS</b>                                       | ***<br>-0.125 | ***<br>-0.189           | 1            |                            |                              |                       |                                           |                                              |                                             |
| <b>Subjective Happiness Scale</b>                   | ***<br>-0.148 | ***<br>-0.205           | ***<br>0.702 | 1                          |                              |                       |                                           |                                              |                                             |
| <b>Satisfaction with Life Scale</b>                 | ***<br>-0.120 | ***<br>-0.164           | ***<br>0.672 | ***<br>0.653               | 1                            |                       |                                           |                                              |                                             |
| <b>Meaning in Life Scale</b>                        | -0.004        | ***<br>-0.079           | ***<br>0.248 | ***<br>0.233               | ***<br>0.245                 | 1                     |                                           |                                              |                                             |
| <b>Basic Psychological Needs Scale: Autonomy</b>    | ***<br>-0.129 | ***<br>-0.153           | ***<br>0.609 | ***<br>0.570               | ***<br>0.589                 | ***<br>0.164          | 1                                         |                                              |                                             |
| <b>Basic Psychological Needs Scale: Relatedness</b> | ***<br>-0.139 | ***<br>-0.183           | ***<br>0.550 | ***<br>0.583               | ***<br>0.533                 | ***<br>0.203          | ***<br>0.664                              | 1                                            |                                             |
| <b>Basic Psychological Needs Scale: Competence</b>  | ***<br>-0.129 | ***<br>-0.171           | ***<br>0.665 | ***<br>0.628               | ***<br>0.646                 | ***<br>0.220          | ***<br>0.688                              | ***<br>0.618                                 | 1                                           |

Note:  
Correlations drawn from sample of participants with data on victimisation, depression, and all wellbeing measures (n=2096).

<sup>a</sup>Depression diagnoses from the CIS-R at 18 years

\* p<0.05, \*\*p<0.01, \*\*\*p<0.001
