# Supplementary material for: Peer victimisation during adolescence and its impact on wellbeing in adulthood: a prospective cohort study
Source: Springer Nature journal article supplement (doi:10.1186/s12889-021-10198-w), 2021-01-15
Supplement: MOESM8 [file 18771850]

**Peer victimisation during adolescence and its impact on wellbeing in adulthood: A prospective cohort study.**

*BMC Public Health*

Jessica M. Armitage<sup>a</sup>, R. Adele H. Wang, Oliver S. P. Davis, Lucy Bowes, Claire M. A. Haworth.

<sup>a</sup>School of Psychological Science, University of Bristol, Bristol, BS8 1TU, United Kingdom.  
jessica.armitage@bristol.ac.uk

**Supplementary Table 7:** Linear regression results from models exploring interactions between victimisation and depression in predicting wellbeing aged 23 years.

|                                                  | Wellbeing |      |         |
|--------------------------------------------------|-----------|------|---------|
|                                                  | Estimate  | SE   | P value |
| <b>Main and interactive effects <sup>a</sup></b> |           |      |         |
| Depression                                       | -5.77     | 1.10 | <0.001  |
| Occasional victimisation                         | -0.80     | 0.42 | <0.05   |
| Frequent victimisation                           | -2.17     | 0.56 | <0.001  |
| Occasional victimisation*Depression              | 0.79      | 1.59 | 0.62    |
| Frequent victimisation*Depression                | -0.74     | 1.71 | 0.67    |

Note:

<sup>a</sup> This model explored the main and interactive effects of depression and victimisation (N=2268).
