# Supplementary material for: Peer victimisation during adolescence and its impact on wellbeing in adulthood: a prospective cohort study
Source: BMC Public Health. 2021 Jan 15;21:148. doi: 10.1186/s12889-021-10198-w (PMC7811215; doi:10.1186/s12889-021-10198-w)
Supplement: Supplementary file 10 — Additional file 10: Supplementary Table 9. Socio-demographic comparisons of participants with complete and missing data. [file 12889_2021_10198_MOESM10_ESM.pdf]

# Peer victimisation during adolescence and its impact on wellbeing in adulthood: A prospective cohort study.

*BMC Public Health*

Jessica M. Armitage<sup>a</sup>, R. Adele H. Wang, Oliver S. P. Davis, Lucy Bowes, Claire M. A. Haworth.

<sup>a</sup>School of Psychological Science, University of Bristol, Bristol, BS8 1TU, United Kingdom. [jessica.armitage@bristol.ac.uk](mailto:jessica.armitage@bristol.ac.uk)

**Supplementary Table 9:** Socio-demographics comparisons of participants with complete and missing data

|                                  | <b>Complete Case Responders<sup>a</sup><br/>(n=1486)</b> | <b>Wellbeing Responders<br/>(n=4041)</b> | <b>Missing Wellbeing Responders<sup>b</sup><br/>(n=2555)</b> | <b>Depression Clinic Responders<br/>(n=4514)</b> | <b>Missing Depression Responders<sup>c</sup><br/>(n=3028)</b> | <b>ALSPAC Sample<br/>(n=15443)</b> | <b>Missing ALSPAC Sample<sup>d</sup><br/>(n=13957)</b> |
|----------------------------------|----------------------------------------------------------|------------------------------------------|--------------------------------------------------------------|--------------------------------------------------|---------------------------------------------------------------|------------------------------------|--------------------------------------------------------|
| Non-white (%)                    | 3.4                                                      | 4.1                                      | 4.6                                                          | 4.3                                              | 4.7                                                           | 5.0                                | 5.3                                                    |
| Non-white mother (%)             | 1.5                                                      | 2.1                                      | 2.5                                                          | 2.2                                              | 2.6                                                           | 2.6                                | 2.8                                                    |
| Parents own car (%)              | 97.0                                                     | 95.2                                     | 93.9                                                         | 95.2                                             | 94.0                                                          | 91.0                               | 89.8                                                   |
| Parents married (%)              | 87.1                                                     | 85.8                                     | 84.8                                                         | 83.8                                             | 81.9                                                          | 79.5                               | 78.4                                                   |
| Mother was homeowner (%)         | 91.1                                                     | 85.6                                     | 81.6                                                         | 86.2                                             | 83.3                                                          | 77.1                               | 74.9                                                   |
| Mother has University degree (%) | 24.5                                                     | 19.9                                     | 16.8                                                         | 19.1                                             | 16.2                                                          | 12.9                               | 11.3                                                   |

**Note:**

<sup>a</sup> Complete case responders have data on wellbeing aged 23, depression aged 18 and all confounding variables.

<sup>b</sup> Individuals with complete data on wellbeing but not depression at 18 years or the confounding variables.

<sup>c</sup> Individuals who completed the CIS-R at the 18-year clinic but do not have data on the confounding variables.

<sup>d</sup> Core singleton ALSPAC sample not in complete case sample.
